# Supplementary material
Source: Springer Nature journal article supplement (https://www.springermedizin.de/resource/supplementary/12948_2005_21_MOESM4_ESM.pdf/9557038)

FITC-CRTH2

*Negative control*

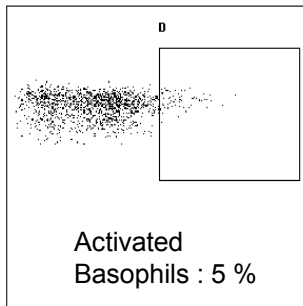

*Positive control (anti-IgE)*

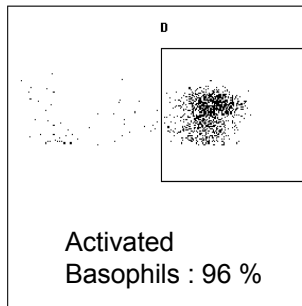

*d1 (/100)*

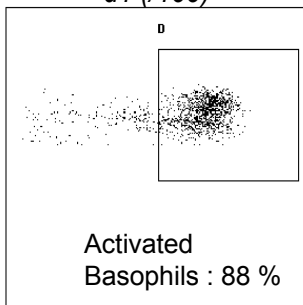

*d1 (/500)*

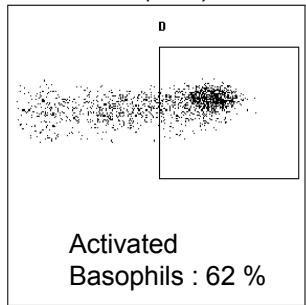

*d1 (/1000)*

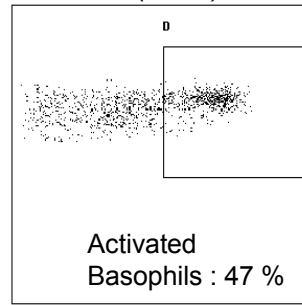

PE-CD203c

Supplement: MOESM4 [file 9557038]
